# Supplementary material
Source: Springer Nature journal article supplement (https://www.springermedizin.de/resource/supplementary/12958_2005_261_MOESM2_ESM.pdf/9567490)

**A. GAPDH**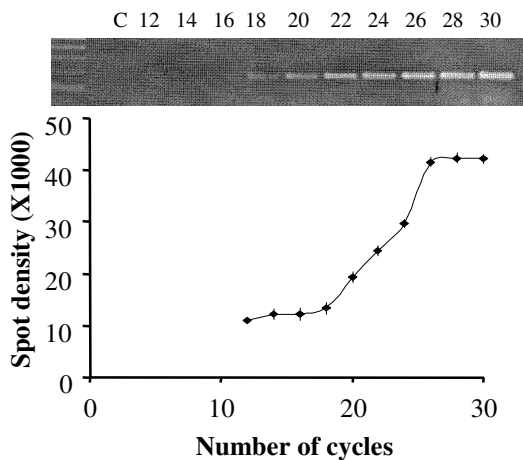**B. 20B-HSD**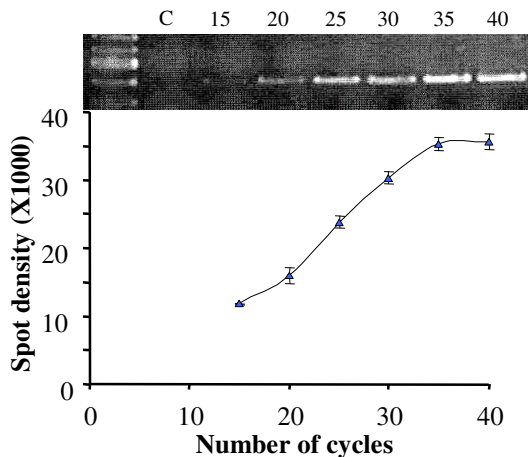**C. FSHR**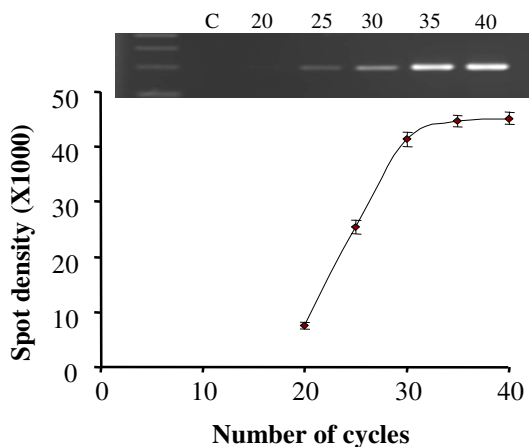**D. LHR**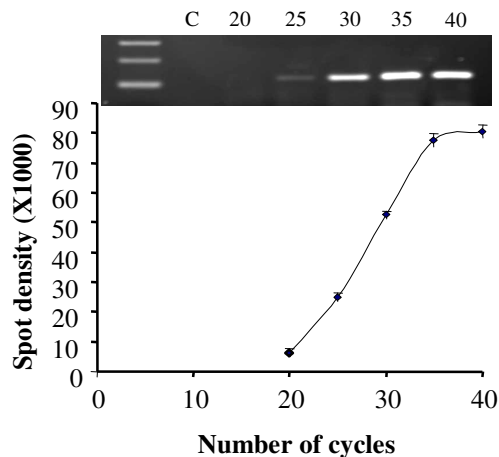**E. PR- $\alpha$** 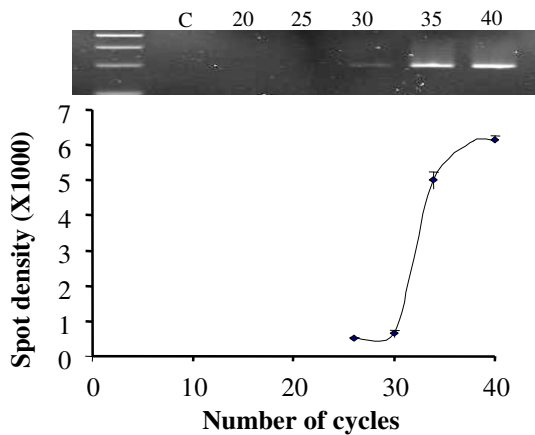**F. PR- $\beta$** 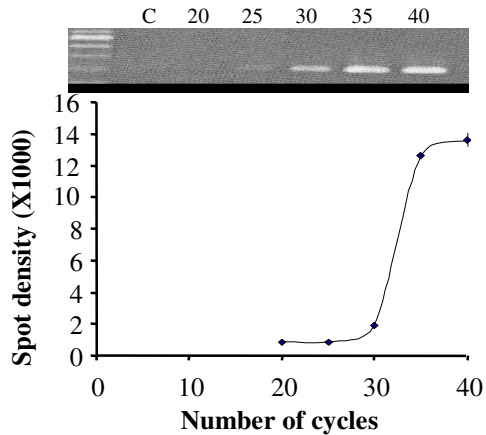

Supplement: MOESM2 [file 9567490]
